# Supplementary material
Source: publisher figshare collection journal article supplement (https://acs.figshare.com/ndownloader/files/3722359)
Supplement: Supplementary file 1 [file 3722359]

## Supporting Information

### Detection of Pathogenic Biofilms with Bacterial Amyloid Targeting Fluorescent Probe, CDy11

Jun-Young Kim,<sup>†,‡,§</sup> Srikanta Sahu,<sup>§</sup> Yin-Hoe Yau,<sup>‡</sup> Xu Wang,<sup>†</sup> Susana Geifman Shochat,<sup>‡</sup> Per Halkjær Nielsen,<sup>‡,‡</sup> Morten Simonsen Dueholm,<sup>‡</sup> Daniel E. Otzen,<sup>#</sup> Jungyeol Lee,<sup>†</sup> May Margarette Salido Delos Santos,<sup>‡</sup> Joey Kuok Hoong Yam,<sup>‡,¶</sup> Nam-Young Kang,<sup>§</sup> Sung-Jin Park,<sup>§</sup> Hawyoung Kwon,<sup>†,‡</sup> Thomas Seviour,<sup>‡</sup> Liang Yang,<sup>‡,‡</sup> Michael Givskov,<sup>‡,¶</sup> Young-Tae Chang<sup>\*,†,§</sup>

<sup>†</sup>Department of Chemistry & Med Chem Program, Life Sciences Institute, National University of Singapore, 3 Science Drive 3, 117543, Singapore

<sup>‡</sup>Singapore Centre on Environmental Life Science Engineering (SCELSE), Nanyang Technological University, 637551, Singapore

<sup>§</sup>Singapore Bioimaging Consortium, Agency for Science, Technology and Research, 11 Biopolis Way, # 02-02 Helios, 138667, Singapore

<sup>‡</sup>School of Biological Sciences, Nanyang Technological University, SBS-04s-43, 60 Nanyang Avenue, 637551, Singapore

<sup>‡</sup>Center for Microbial Communities, Department of Chemistry and Bioscience, Aalborg University, Fredrik Bajers Vej 7H, 9220 Aalborg, Denmark

<sup>‡</sup>Interdisciplinary Nanoscience Center (iNANO), Department of Molecular Biology and Genetics, Center for Insoluble Protein Structures (inSPIN), Aarhus University, 8000 Aarhus C, Denmark

<sup>‡</sup>Interdisciplinary Graduate School, Nanyang Technological University, 637551, Singapore

<sup>‡</sup>Costerton Biofilm Center, Department of Immunology and Microbiology, Faculty of Health and Medical Sciences, University of Copenhagen, Blegdamsvej 3B, DK-2200 Copenhagen, Denmark

## Table of contents

Figure S1. Test of **CDy11** in two growth states of *P. aeruginosa*.

Figure S2. Test of **CDy11** as different bacterial amyloid targeting probe.

Figure S3. Response of **CDy11** against serially diluted biofilms.

Figure S4. Analysis of Pearson's correlations between **CDy11** and Cy5-Fap signals in biofilms.

Figure S5. Propagation of *P. aeruginosa* post infection in the corneal infection model.

Figure S6. Quadruple-fluorescent images from eye section with **CDy11**/PAO1-GFP/Hoechst/Cy5-Fap antibody

Figure S7. Application of **CDy11** in an implant model.

Scheme S1. Synthesis of **CDy11**.

Table S1. Spectroscopic properties and purity table for **CDy11**.

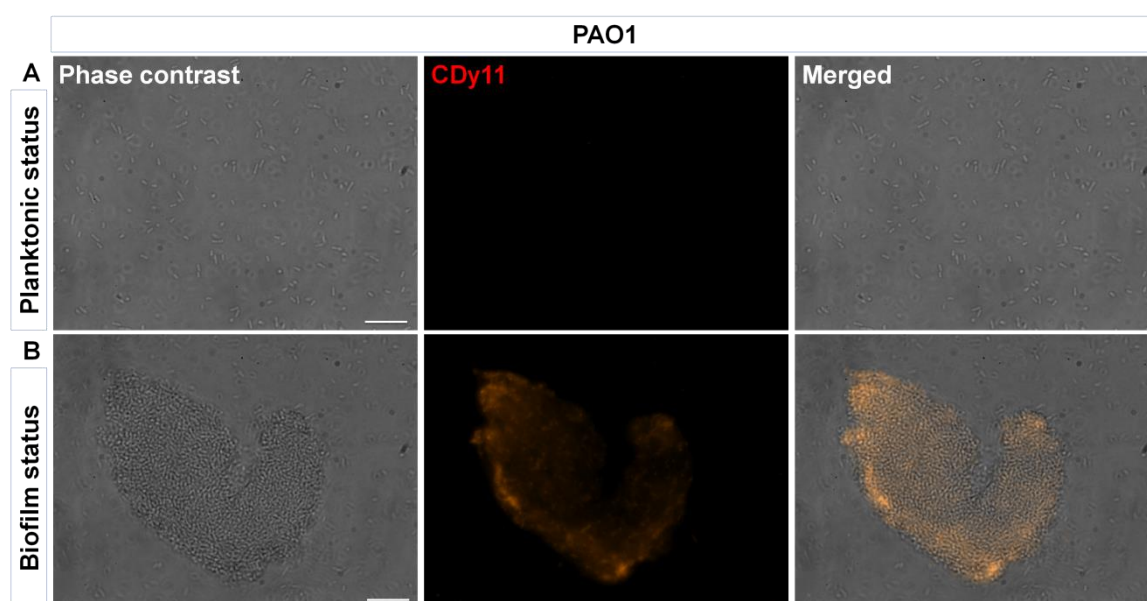

**Figure S1. Test of CDy11 in two different growth states of *P. aeruginosa*.** Same concentration (1  $\mu$ M) of CDy11 was applied to the two different status of *P. aeruginosa* in order to investigate the specificity of CDy11. Planktonic cells were prepared from liquid cultures and incubated with CDy11. Biofilms were grown on cover glass and incubated for 1 hour with CDy11 before acquiring images. (A) No fluorescent signals were detected for the planktonic cells, whereas (B) biofilms were labeled by CDy11. Scale bars, 10  $\mu$ m.

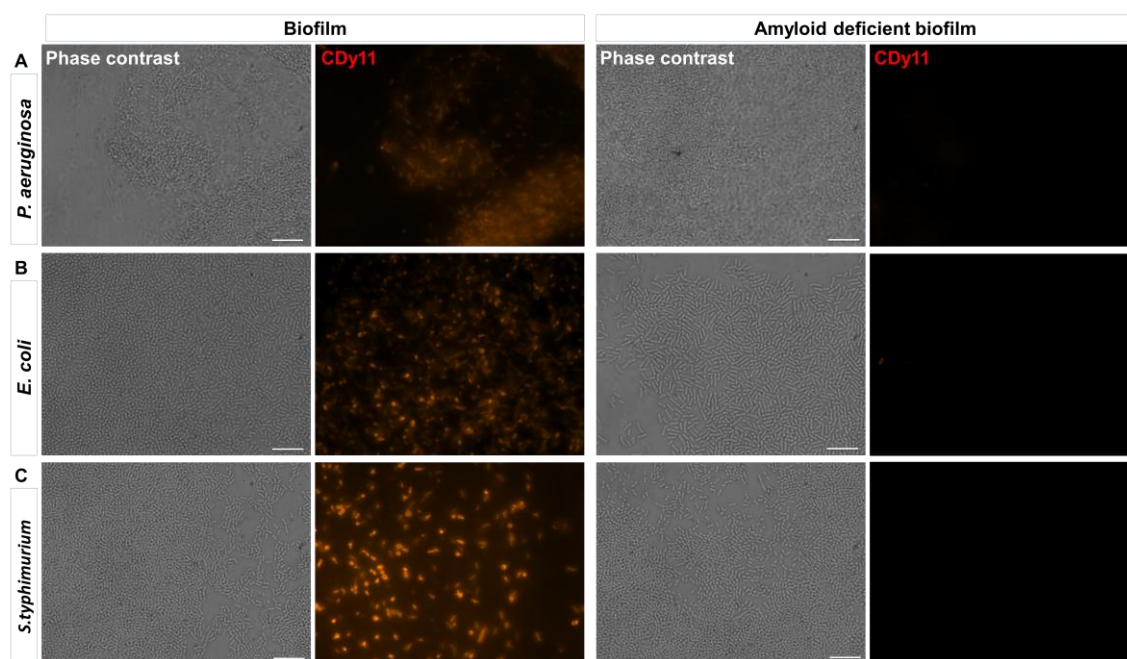

**Figure S2. Test of CDy11 as different bacterial amyloid targeting probe.** CDy11 signals were only observed in *P. aeruginosa*, *E. coli* and *S. typhimurium* when amyloids were synthesized in biofilm matrix. (A) Biofilms of *P. aeruginosa* (PAO1 and PAO1 $\Delta$ fap). (B) Biofilms of *E. coli* (UTI89 and UTI98 $\Delta$ curli). (C) Biofilms of *S. typhimurium* (UMRI and MAE32). Scale bars, 10  $\mu$ m.

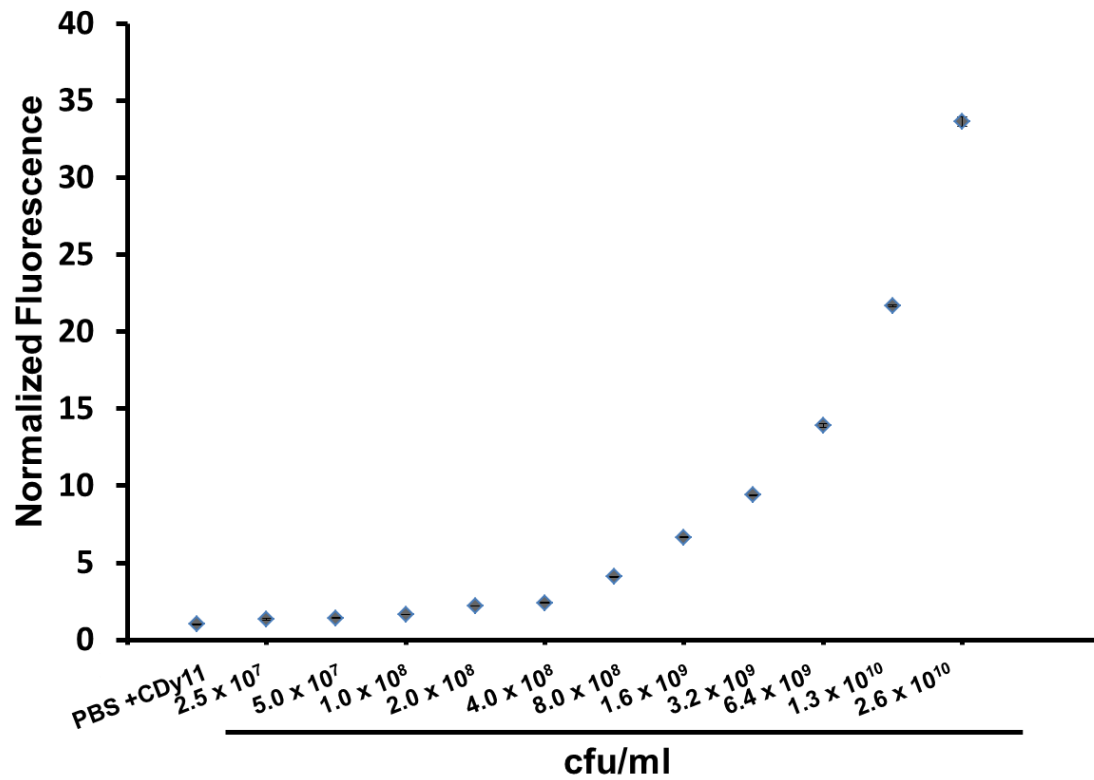

**Figure S3. Response of CDy11 against serially diluted biofilms.** Serially diluted biofilms were incubated with CDy11 (10  $\mu$ M) and the intensity of CDy11 was normalized with CDy11 in PBS.

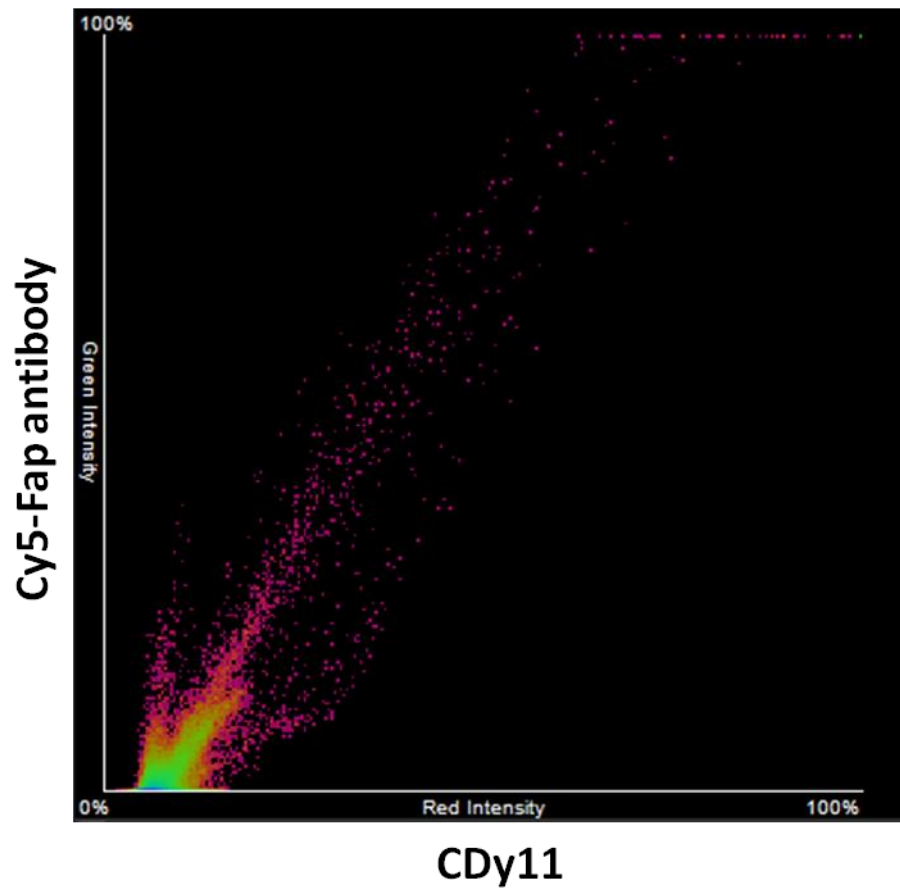

**Figure S4. Analysis of Pearson's correlations between CDy11 and Cy5-Fap signals in biofilms.** PAO1 biofilm images by Cy-Fap antibody and CDy11 double labeled signals were analyzed by NIS-Elements software (Nikon, Japan). Pearson's correlation value was calculated to  $0.91 \pm 0.7$  (x-axis, CDy11; y-axis, Cy5-Fap).

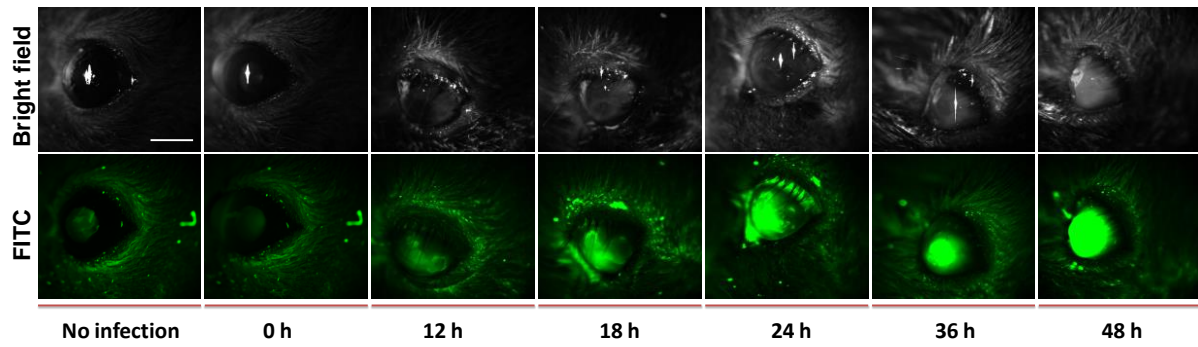

**Figure S5. Propagation of *P. aeruginosa* post infection in the corneal infection model.** Bright field images and corresponding GFP signals determined by stereomicroscopy in cornea at various time points post infection with *P. aeruginosa* (PAO1-GFP). GFP signal indicative of *P. aeruginosa* (PAO1-GFP) was detected in the mouse cornea 12 hours post infection. The GFP signal increased in a time dependent manner and was fully saturated 36 hours post infection. Scale bar, 2 mm.

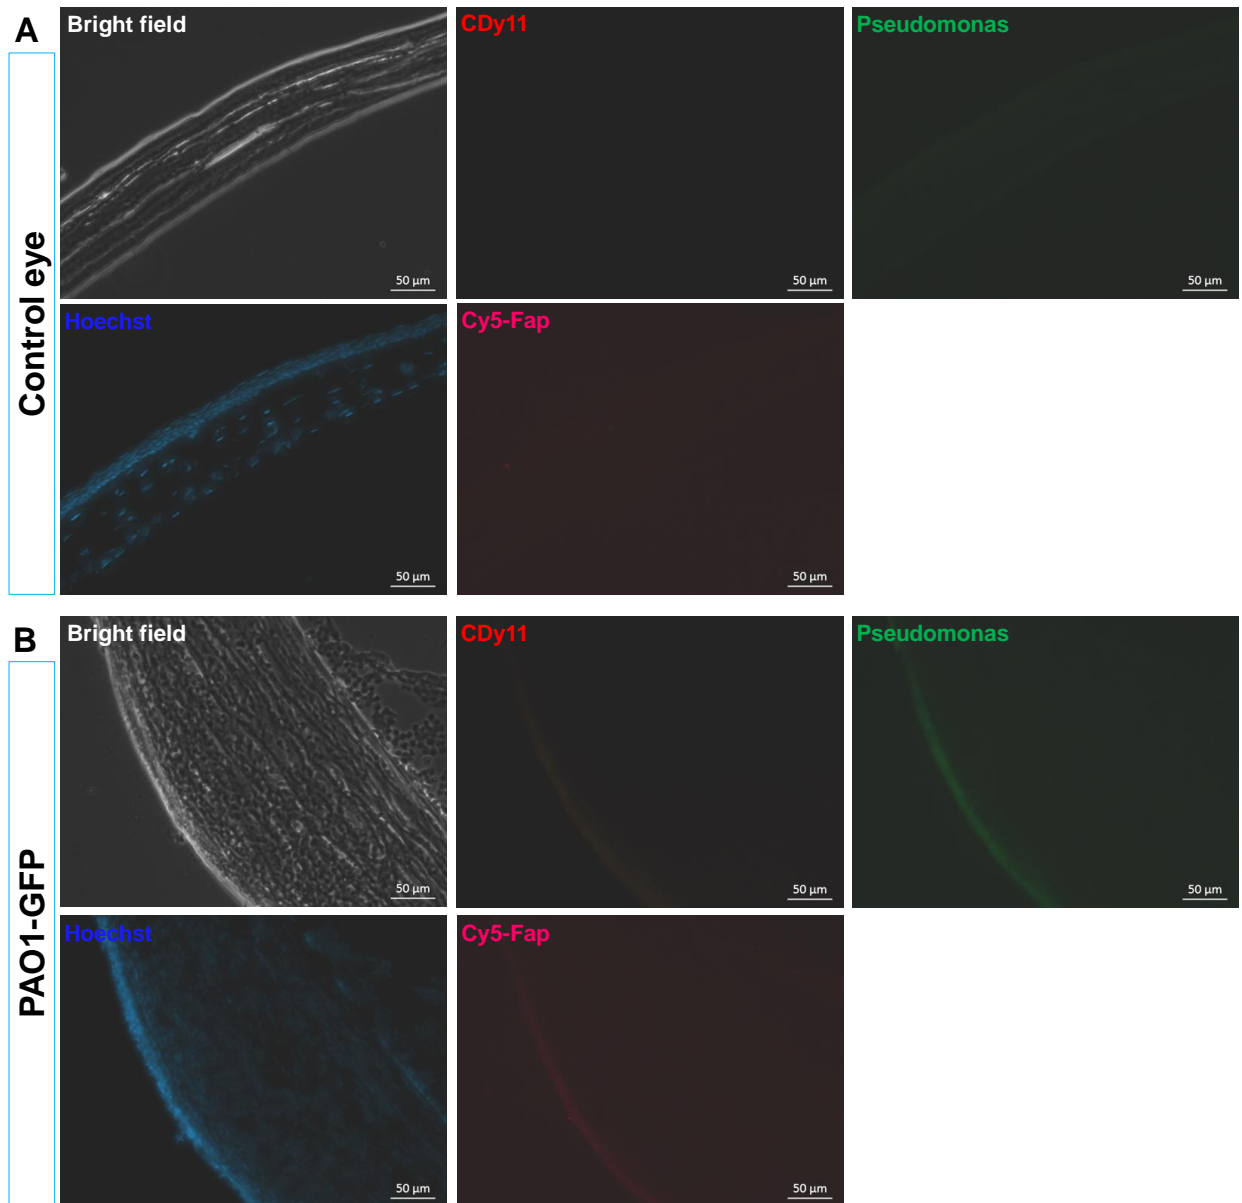

**Figure S6. Quadruple-fluorescent images from eye section with CDy11/PAO1-GFP/Hoechst/Cy5-Fap antibody.** (A) Eye sectioning samples from control eye without infection of *P. aeruginosa*. (B) PAO1-GFP infected eye sectioning sample. Clockwise from upper left; Bright field image, CDy11, PAO1-GFP, Hoechst and Cy5-Fap antibody. Eyes were frozen in OCT media after 1 hour incubation with 10 μM CDy11. Sectioning samples with 14 μm thickness was incubated with Fap antibody. Subsequently, Cy5-secondary antibody was incubated and Hoechst dye was treated before imaging under fluorescent microscopy.



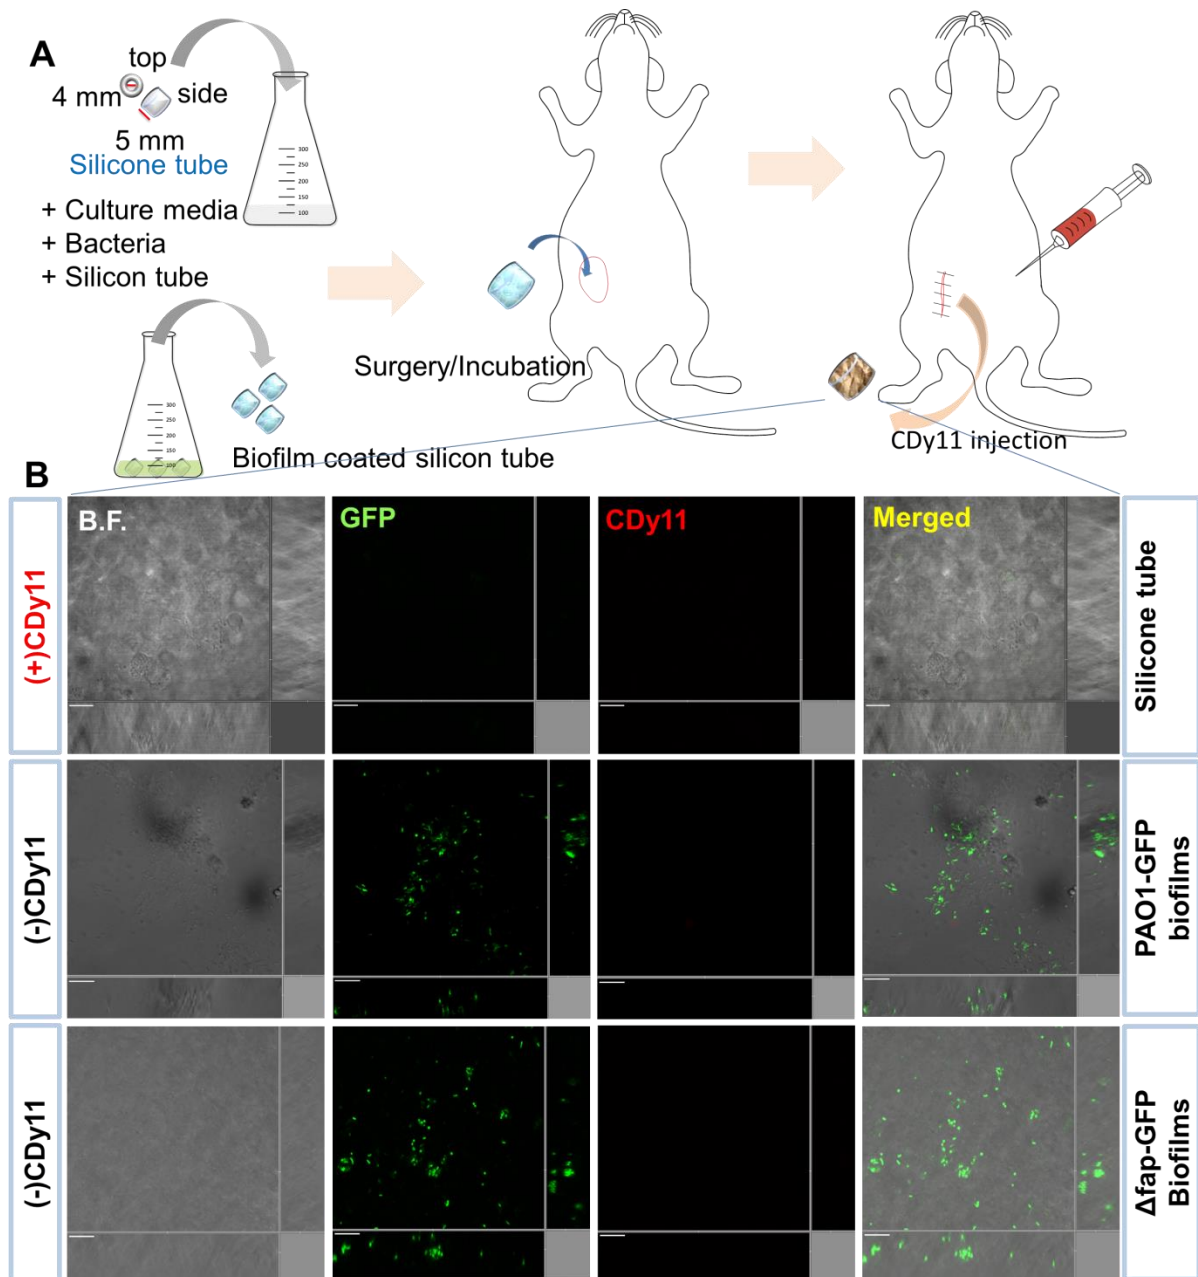

**Figure S7. Application of CDy11 in implant model.** (A) Preparation of silicone tube for coating with *P. aeruginosa* and insertion of silicone tubes that were pre-coated with PAO1-GFP and PAO1 $\Delta$ fap-GFP biofilms into BALB/c mice. After 1 day incubation, CDy11 into peritoneal cavity was injected for testing the feasibility of CDy11. (B) CLSM images were acquired from silicone tubes removal from mice. Green fluorescent areas represent the distribution of *P. aeruginosa*. The fluorescence intensity of CDy11 was very low and the same for all sample. Scale bars, 10  $\mu$ m.

## General synthetic procedure and characterization of compound CDy11.

**General information:** All the chemicals and solvents were purchased from Sigma Aldrich, Alfa Aesar, Fluka, MERCK or Acros and used without further purification. Normal phase purifications were carried out using Merck Silica Gel 60 (particle size: 0.040-0.063 mm, 230-400 mesh). Analytical characterization was performed on a HPLC-MS (Agilent-1200 series) with a DAD detector and a single quadrupole mass spectrometer (6130 series) with an ESI probe. Analytical method, unless indicated, gradient solvent system was water: acetonitrile (ACN) (95:5 to 5:95) with 0.1% HCOOH in run time of 10 min; C18 (2) Luna column (4.6 × 50 mm 2, 5 mm particle size). <sup>1</sup>H-NMR and <sup>13</sup>C-NMR spectra were recorded on a Bruker Avance 300 MHz NMR spectrometer, and chemical shifts were expressed in parts per million (ppm). All the photo-physical studies of CDy11 were performed in SpectraMax®M2 spectrophotometer (Molecular Devices) instrument and the obtained data were analyzed using the Microsoft Office Excel.

### Synthesis of CDy11.

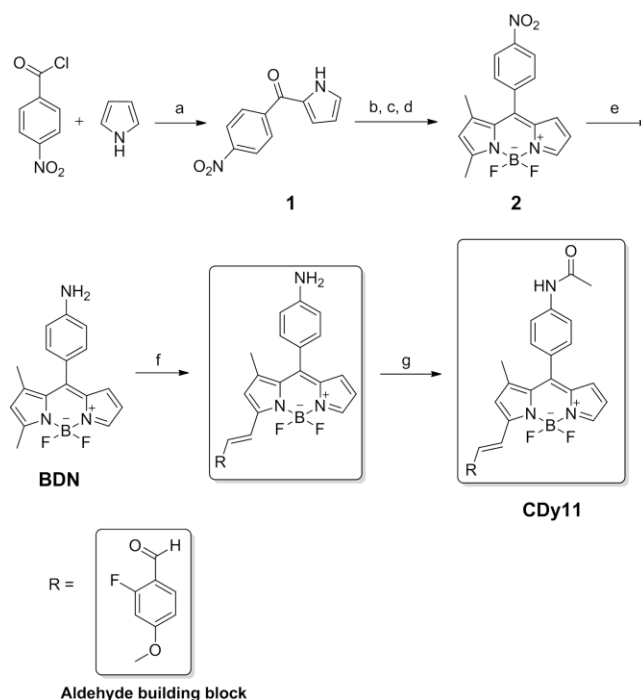

**Scheme 1.** (a) MeMgBr, -78 °C → 25 °C, overnight; (b) NaBH<sub>4</sub>, 0 °C → 25 °C, THF/H<sub>2</sub>O (10:1), 2h; (c) 2, 4-dimethyl pyrrole, InCl<sub>3</sub>, CH<sub>2</sub>Cl<sub>2</sub>; (d) i. DDQ in CH<sub>2</sub>Cl<sub>2</sub>, ii. BF<sub>3</sub>.Et<sub>2</sub>O, TEA; (e) Pd/C, hydrazine monohydrate, EtOH, reflux, 2h; (f) RCHO, pyrrolidine, 85 °C, acetonitrile, 5 min.; (g) acetyl chloride (AcCl), NaHCO<sub>3</sub>, CH<sub>2</sub>Cl<sub>2</sub>, 30 min.

**General Procedure for the Synthesis of compound CDy11.** To a solution of BODIPY Aniline (BDN)1 (x eq.) in dry acetonitrile (ACN) was added with corresponding aldehyde (4x eq.), followed by pyridine (6x eq.) and refluxed at 85 °C for 5 min. The crude condensed BODIPY compound was finally purified by normal silica gel chromatography in 7:3 hexane and ethyl acetate mixture. The purified compound (0.02 mili moles) from the above step was

dissolved in dichloromethane (DCM) and added with 100  $\mu$ L of saturated solution of  $\text{NaHCO}_3$ , followed by acetyl chloride (5 eq.) at 0  $^\circ\text{C}$ . Then the reaction mixture was stirred at room temperature for 30 minutes. The acetylated compound was purified by silica gel chromatography in 7:3 hexane and ethyl acetate mixture.  $^1\text{H}$  NMR ( $\text{CDCl}_3$ , 300 MHz):  $\delta$  1.69 (s, 3H), 2.28 (s, 3H), 3.89 (s, 3H), 6.45 (m, 2H), 6.68 (m, 1H), 6.8 (m, 2H), 7 (s, 1H), 7.38 (m, 3H), 7.74 (m, 5H).  $^{13}\text{C}$  NMR ( $\text{DMSO-d}_6$ , 75 MHz):  $\delta$  15.5, 24.5, 56.4, 102.4, 112.1, 116.3, 116.4, 116.7, 118.8, 120.2, 126.4, 127.9, 130.0, 130.1, 130.7, 130.8, 133.6, 134.8, 138.3, 141.1, 142.0, 146.1, 158.0, 162.5, 162.6, 169.1, 174.6. HRMS:  $m/z$  ( $\text{C}_{27}\text{H}_{22}\text{BF}_3\text{N}_3\text{O}_2$ ) calculated: 488.1767, found: 488.1751 (M-H). Extinction coefficient ( $\epsilon$ ): 12456  $\text{M}^{-1}\text{cm}^{-1}$  (Solvent: Ethanol, Wavelength ( $\lambda$ ): 558 nm).

### $^1\text{H}$ NMR (300 MHz, $\text{CDCl}_3$ ) spectrum of CDy11

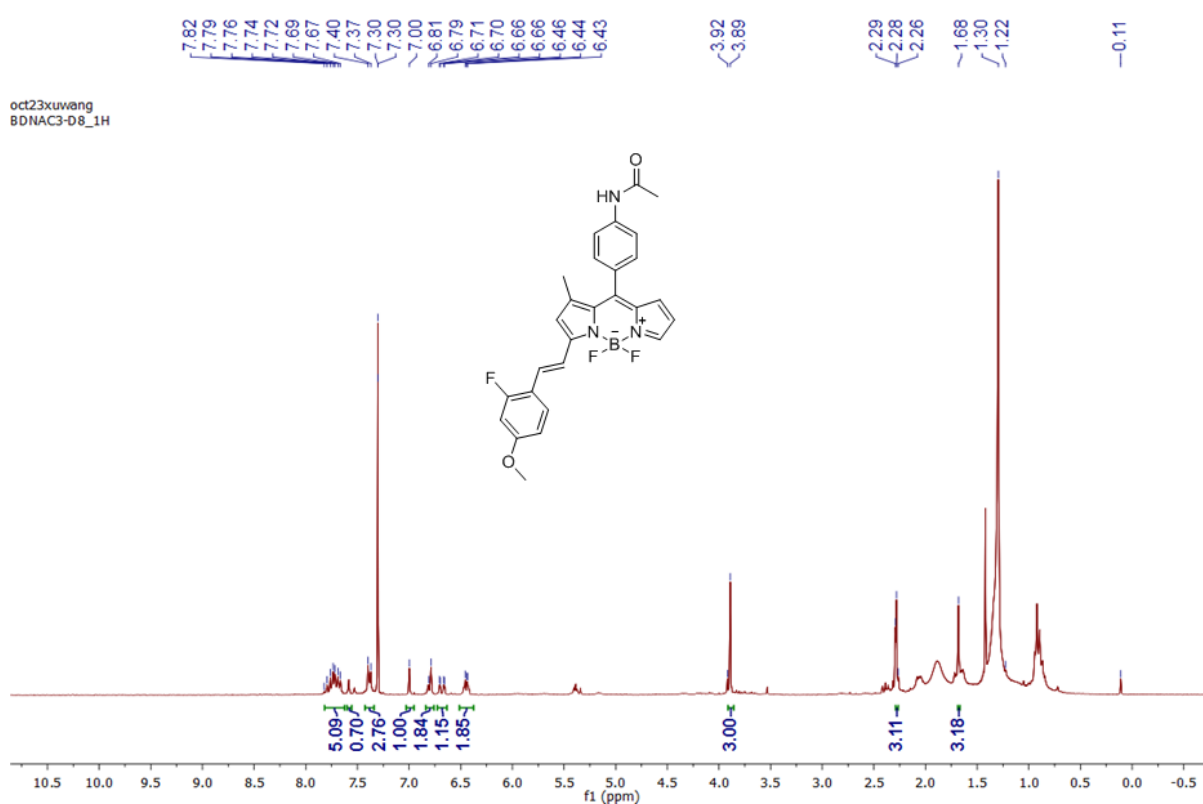

## **<sup>13</sup>C NMR (75 MHz, DMSO-d<sub>6</sub>) spectrum of CDy11**

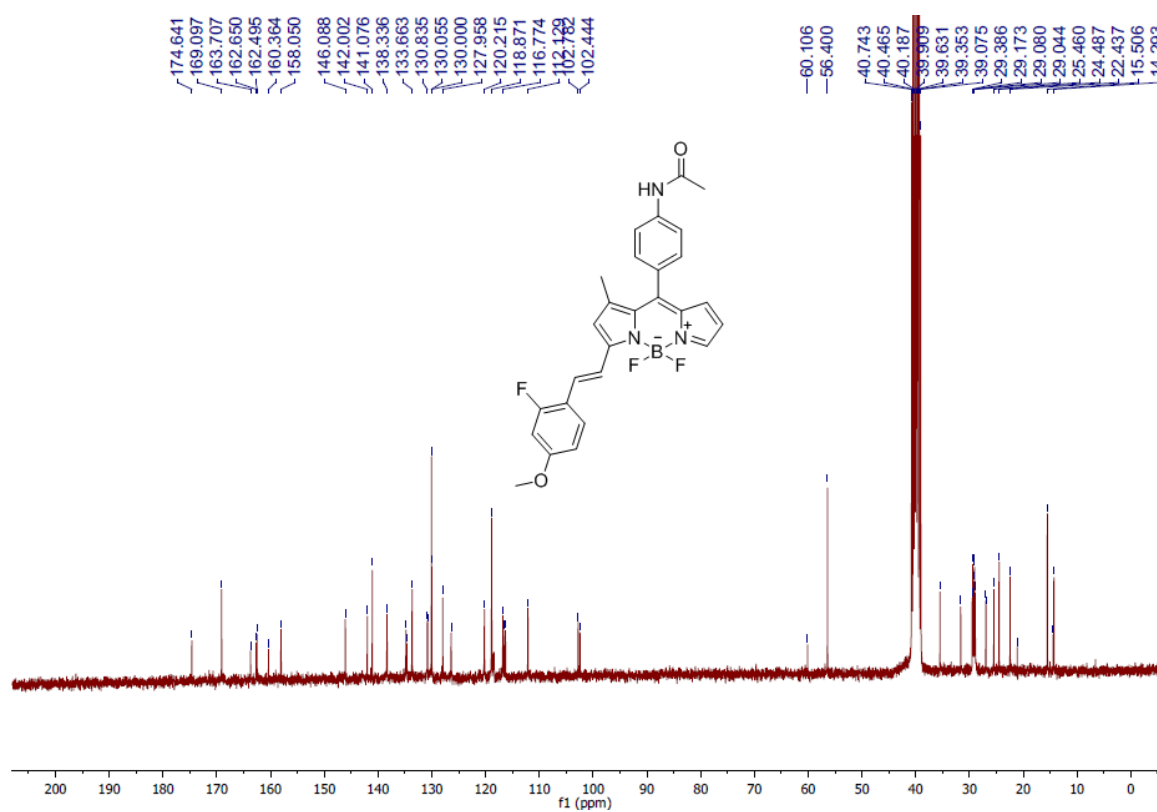

## **HPLC Spectrum of CDy11**

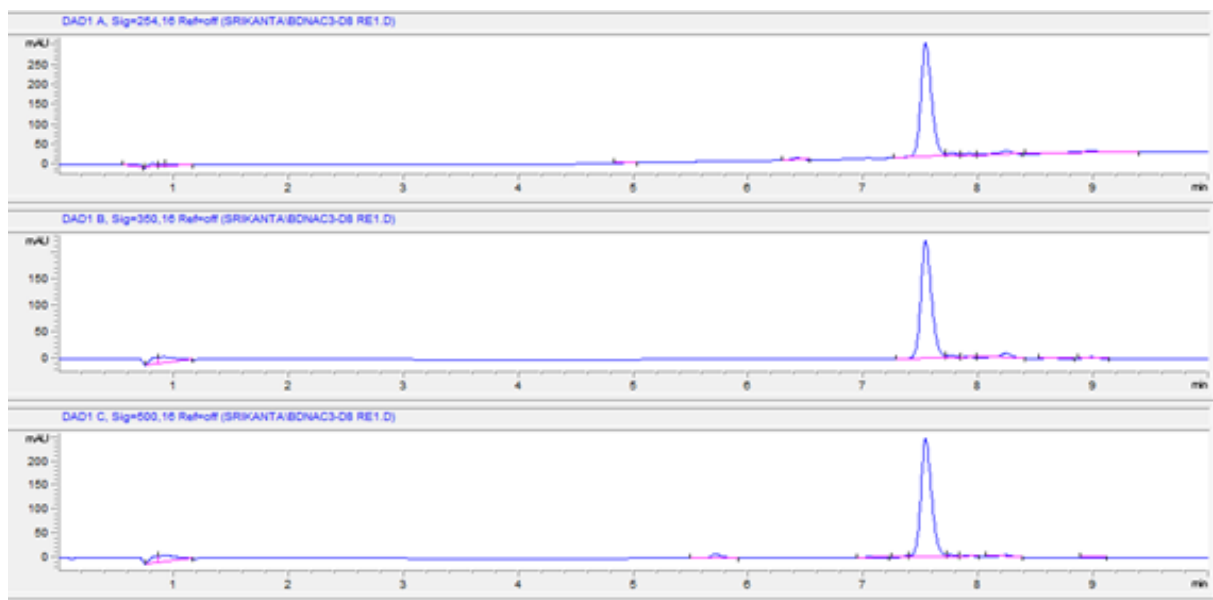

## MS spectrum of CDy11

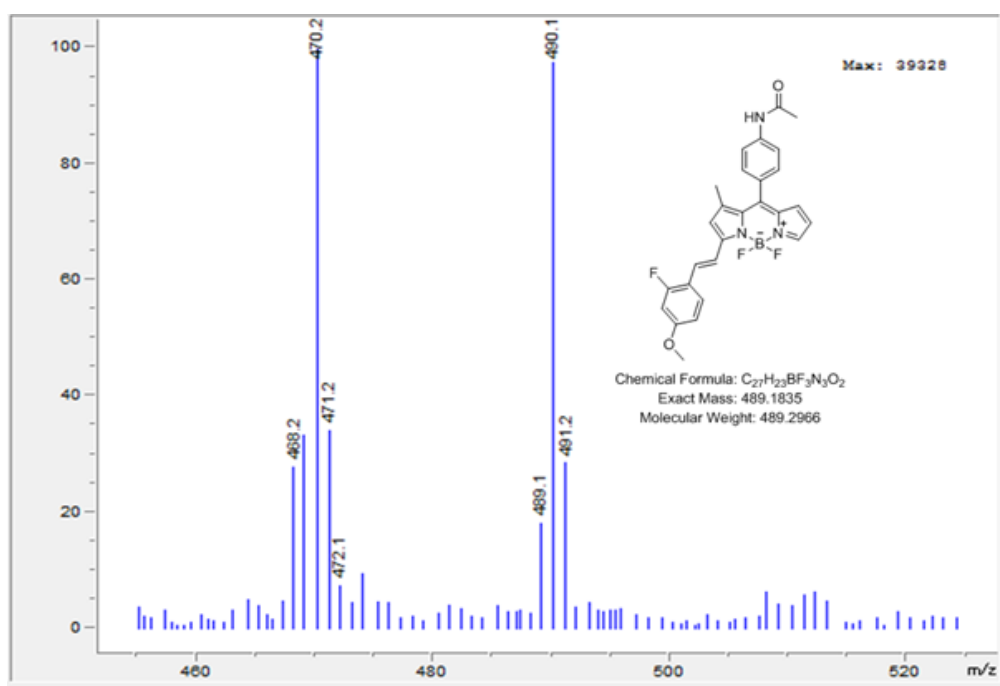

# ESI HRMS of CDy11

## Analysis Info

Analysis Name D:\Data\Chemistry\2014 Sample\Dec 2014\BDNAC3-D8-2n.d  
 Method YCH\_Pos-150-1800.m  
 Sample Name BDNAC3-D8  
 Comment Prof. Chang Young-Tae

Acquisition Date 12/15/2014 10:21:43 AM

Operator default user  
 Instrument / Ser# micrOTOF-Q II 10269

## Acquisition Parameter

|             |            |                       |           |                  |           |
|-------------|------------|-----------------------|-----------|------------------|-----------|
| Source Type | ESI        | Ion Polarity          | Negative  | Set Nebulizer    | 2.0 Bar   |
| Focus       | Not active | Set Capillary         | 3500 V    | Set Dry Heater   | 200 °C    |
| Scan Begin  | 50 m/z     | Set End Plate Offset  | -500 V    | Set Dry Gas      | 6.0 l/min |
| Scan End    | 1800 m/z   | Set Collision Cell RF | 200.0 Vpp | Set Divert Valve | Waste     |

| Meas. m/z | # | Formula                                                                       | m/z      | err [ppm] | rdB  | e <sup>-</sup> Conf | N-Rule |
|-----------|---|-------------------------------------------------------------------------------|----------|-----------|------|---------------------|--------|
| 488.1751  | 1 | C <sub>27</sub> H <sub>22</sub> BF <sub>3</sub> N <sub>3</sub> O <sub>2</sub> | 488.1767 | 3.3       | 17.5 | even                | ok     |

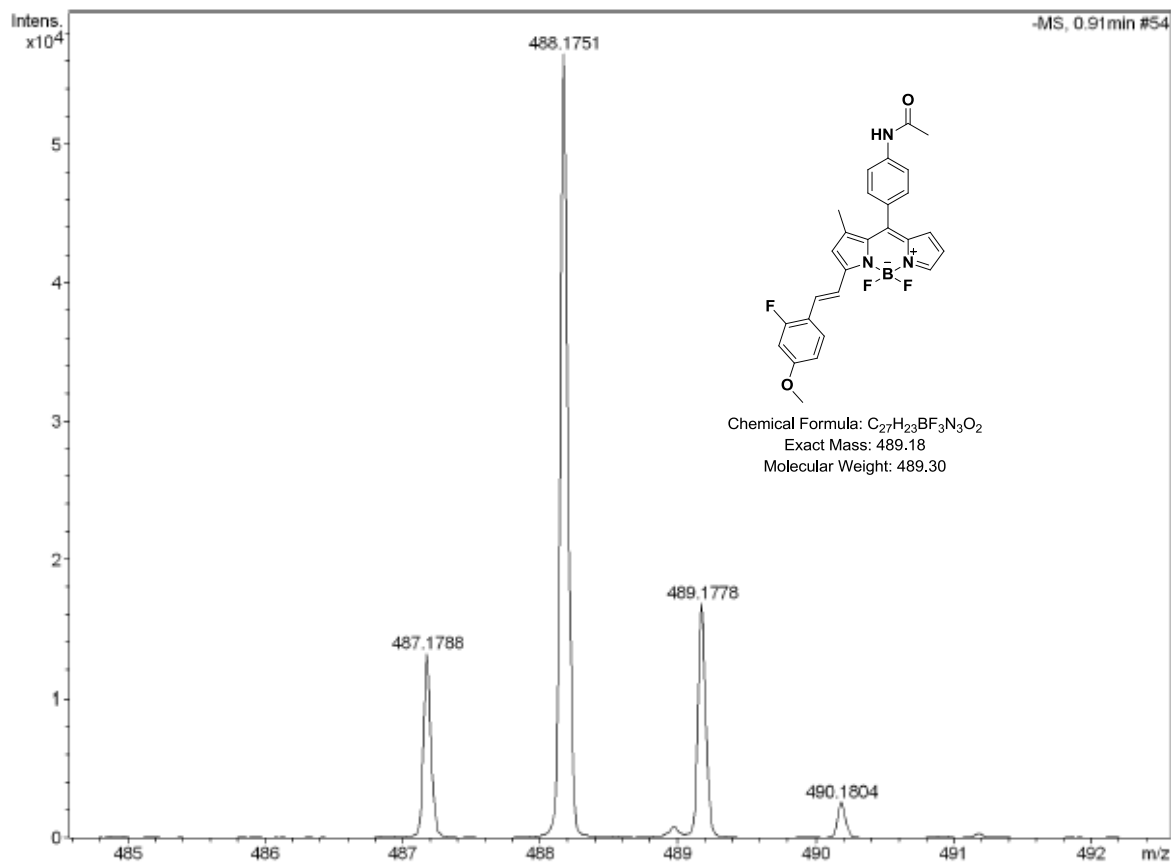

## Absorption and emission spectra of CDy11

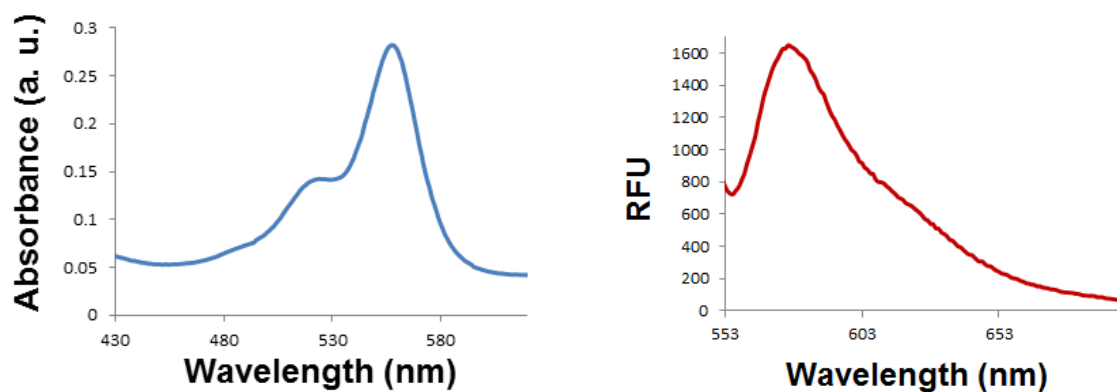

Absorption and emission spectra of CDy11 were measured at the concentration of 20  $\mu\text{M}$  in Ethanol, Excitation wavelength ( $\lambda_{\text{ex}}$ ) = 510nm.

**Table S1. Spectroscopic properties and purity table for CDy11:** absorbance maximum ( $\lambda_{\text{abs}}$ ), fluorescent emission maximum ( $\lambda_{\text{em}}$ ), and quantum yield (QY).

| Compound     | $M^+$ (cal) | $M^+$ 1(exp) | Abs (nm) | Em (nm) | QY    | Purity (%) |
|--------------|-------------|--------------|----------|---------|-------|------------|
| <b>CDy11</b> | 489.1       | 490.1        | 558      | 576     | 0.047 | 97         |

## Reference:

Kang, N. Y.; Lee, S. C.; Park, S. J.; Ha, H. H.; Yun, S. W.; Kostromina, E.; Gustavsson, N.; Ali, Y.; Chandran, Y.; Chun, H. S.; Bae, M.; Ahn, J. H.; Han, W.; Radda, G. K.; Chang, Y. T. *Angew. Chem. Int. Edit.* 2013, 52, 8557.
